# Supplementary material
Source: PubMed Central journal article supplement (PMC6307873)
Supplement: jexbio-221-189480-s1.pdf [file jexbio-221-189480-s1.pdf]

**Table S1. Internal standards utilized in lipidomic and untargeted metabolomic analysis.**

| Internal Standard                                          | Molecule Class           | Analysis     |
|------------------------------------------------------------|--------------------------|--------------|
| 1-heptadecanoyl-2-hydroxy-sn-glycero-3-phosphocholine      | Lysophosphatidylcholine  | Lipidomics   |
| 1,2-diheptadecanoyl-sn-glycero-3-phosphocholine            | Phosphatidylcholine      | Lipidomics   |
| 1,2-diheptadecanoyl-sn-glycero-3-phosphoethanolamine       | Phosphatidylethanolamine | Lipidomics   |
| 1,2-diheptadecanoyl-sn-glycero-3-phospho-L-serine          | Phosphatidylserine       | Lipidomics   |
| N-heptadecanoyl-D-erythro-sphingosylphosphorylcholine      | Sphingomyelin            | Lipidomics   |
| cholest-5-en-3 $\beta$ -yl heptadecanoate                  | Ceramide                 | Lipidomics   |
| 1-palmitoyl-2-oleoyl-sn-glycerol                           | Diacylglycerolipid       | Lipidomics   |
| 1-heptadecanoyl-rac-glycerol                               | Monoadylglycerolipid     | Lipidomics   |
| 1,2,3-triheptadecanoyl-glycerol                            | Triacylglycerolipid      | Lipidomics   |
| N-heptadecanoyl-D-erythro-sphingosine                      | Ceramide                 | Lipidomics   |
| 1,2-diheptadecanoyl-sn-glycero-3-phosphate                 | Glycerophosphate         | Lipidomics   |
| 1,2-diheptadecanoyl-sn-glycero-3-phospho-(1'-rac-glycerol) | Phosphoglycerol          | Lipidomics   |
| Epibrassinolide                                            | Plant steroid            | Metabolomics |
| L-Tryptophan- <sup>15</sup> N <sub>2</sub>                 | Heavy amino acid         | Metabolomics |
| Zeatin                                                     | Plant hormone            | Metabolomics |
| L-[ <sup>15</sup> N]-Anthranilic Acid                      | Heavy aromatic acid      | Metabolomics |
| Thymine-d4 (methyl-d3,6-d1)                                | Heavy nucleic acid       | Metabolomics |

**Table S2. Metabolites in University of Michigan Metabolomics Resource Core in-house database at time of analysis.**

[Click here to download Table S2](#)

**Table S3. Diapause incidence for experimental samples.**

| Diapause/Non-Diapause | Replicate | Total Eggs | % Diapause |
|-----------------------|-----------|------------|------------|
| Non-Diapause          | 1         | 672        | 10.4%      |
| Non-Diapause          | 2         | 356        | 6.9%       |
| Non-Diapause          | 3         | 290        | 14.0%      |
| Non-Diapause          | 4         | 961        | 6.3%       |
| Non-Diapause          | 5         | 394        | 11.4%      |
| Non-Diapause          | 6         | 491        | 8.8%       |
| Non-Diapause          | 7         | 1047       | 12.3%      |
| Non-Diapause          | 8         | 597        | 11.3%      |
| Diapause              | 1         | 560        | 100.0%     |
| Diapause              | 2         | 393        | 99.7%      |
| Diapause              | 3         | 486        | 99.8%      |
| Diapause              | 4         | 593        | 99.2%      |
| Diapause              | 5         | 544        | 99.2%      |
| Diapause              | 6         | 344        | 99.3%      |
| Diapause              | 7         | 204        | 100.0%     |

**Table S4. Log2FC for all features with RSD<30% measured in experiment.**

[Click here to download Table S4](#)

**Table S5. HMDB classification of annotated metabolites co-eluting with diapause-exclusive features**

[Click here to download Table S5](#)

**Table S6. Metabolites by pathway for QEA top 10.**

[Click here to download Table S6](#)

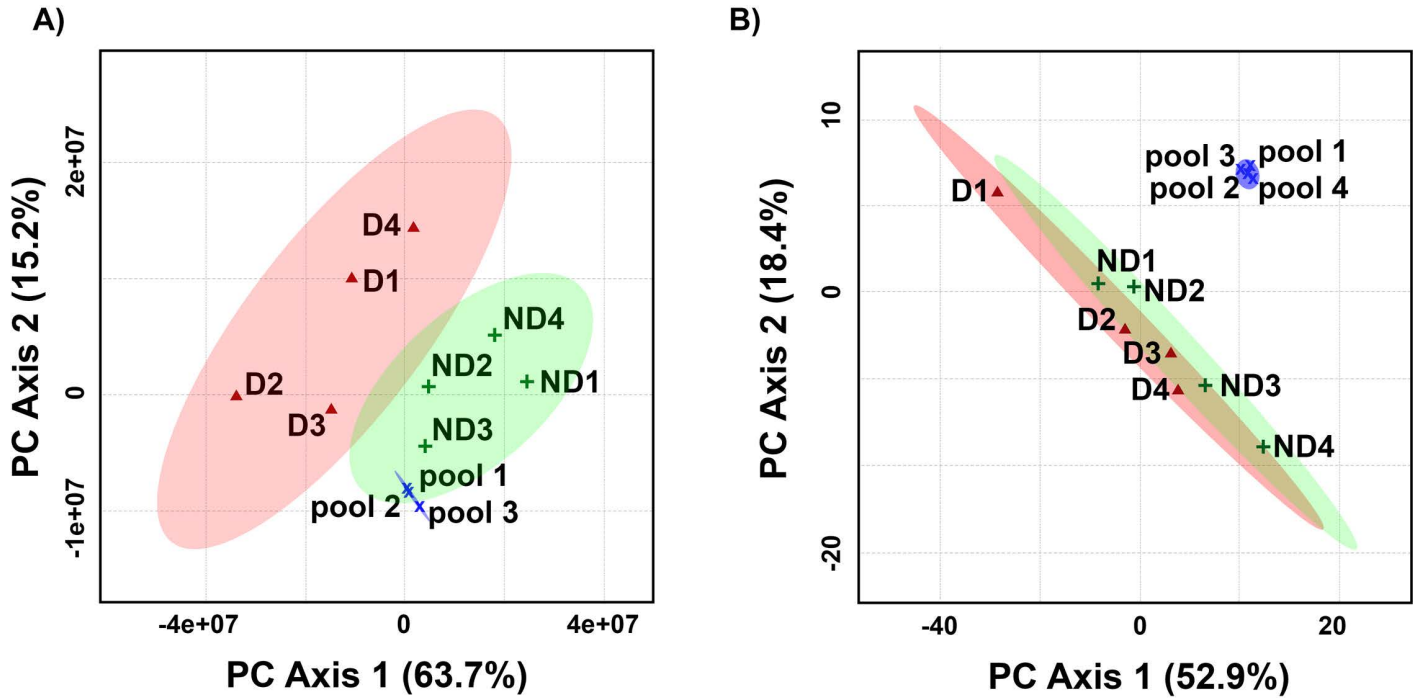

**Fig. S1.** Pooled quality control samples show consistent overall profiles across repeated measurements. Principal 955 component analysis (PCA) plot of [A] lipidomic profiles with pooled QC samples and in [B] untargeted 956 metabolomics profiles with pooled QC samples. In both plots, red triangles represent biological replicates of 957 diapause eggs reared under short-day photoperiod (8 h light: 16 h dark). Green crosses represent biological 958 replicates of non-diapause eggs reared under long-day photoperiod (16 h light: 8 h dark). Blue X's represent 959 technical replicates of pooled QC samples. Red, green, and blue shaded regions surrounding the points represent 960 the 95% confidence interval for diapause eggs, non-diapause eggs, and pooled QC samples, respectively. The tight 961 clustering of QC sample reads indicates low machine drift and consistency of the analytical platform across 962 experiment.

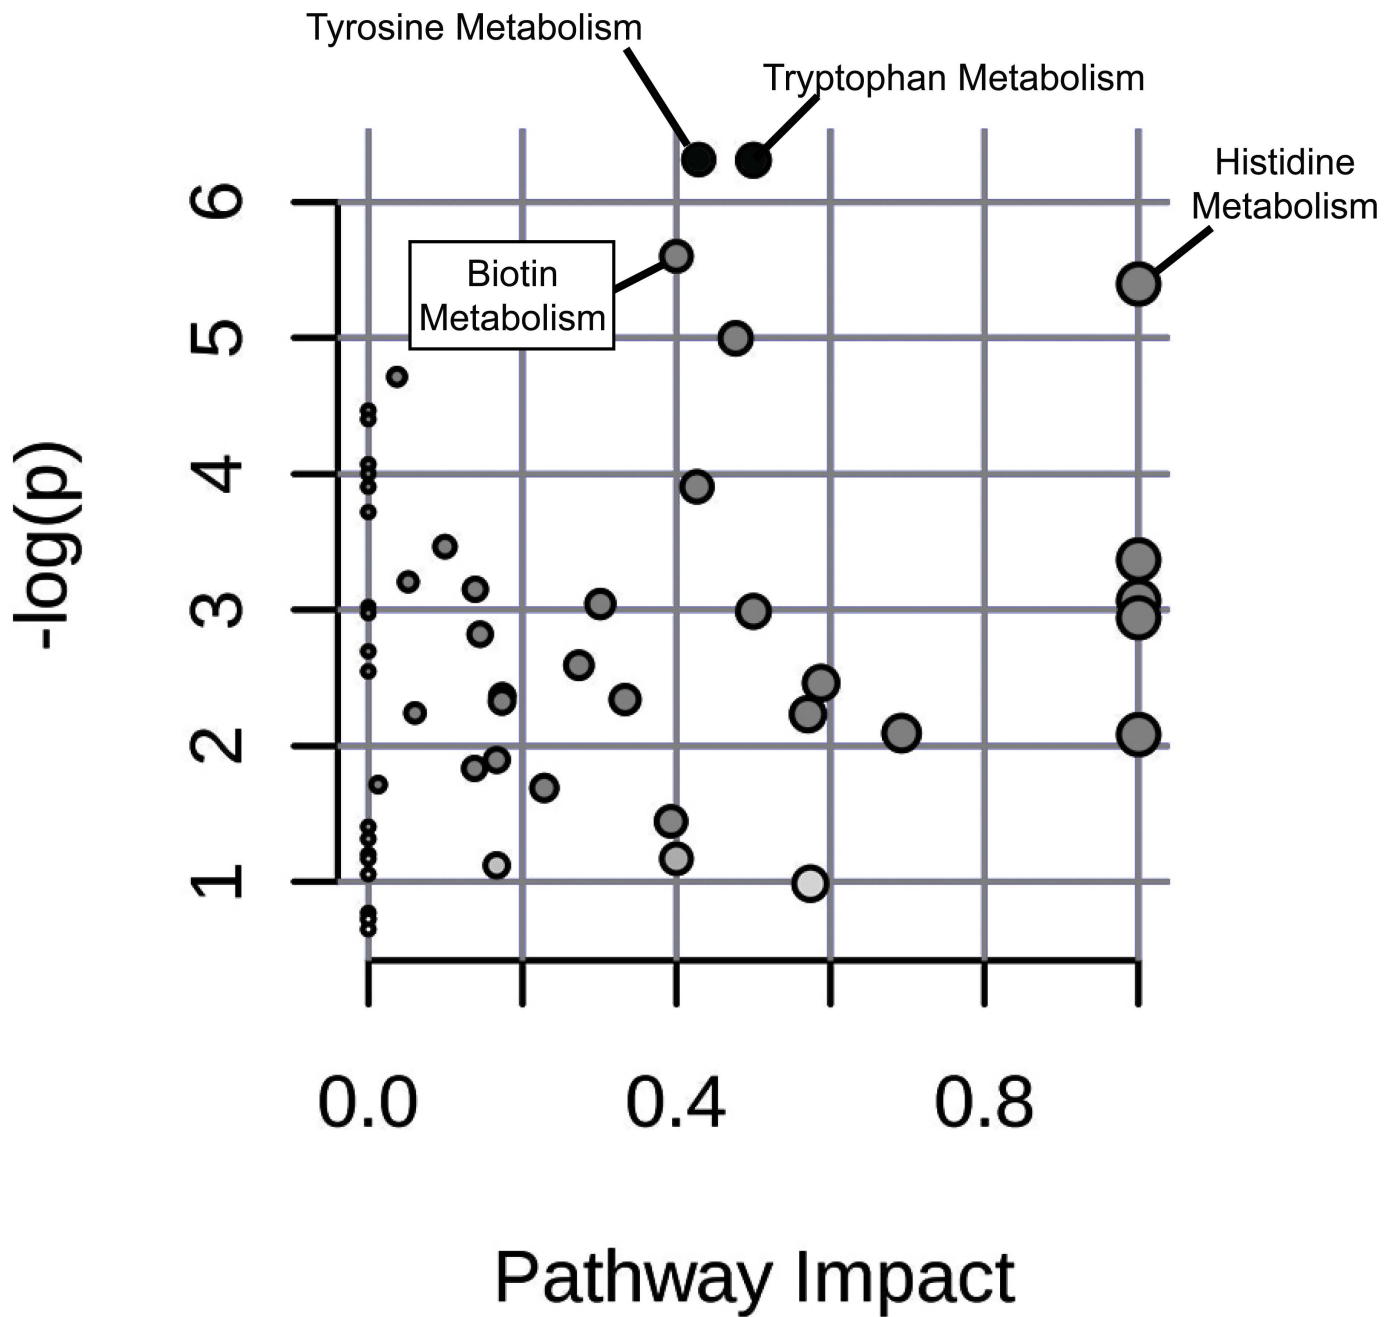

**Fig. S2.** Altered pathways identified to Pathway Enrichment Analysis. Pathway impact is a measure ranging from zero to one that quantifies topological information about the affected metabolites. 966 Metabolic pathways with large changes in well-connected metabolites score higher corresponding to a 967 larger predicted effect on the overall pathway. Each dot represents a pathway. Light gray dots represent 968 non-significant impacts while black dots represent statistically significant impacts ( $p < 0.05$  after FDR). 969 The size of the dot reflects the number of molecules affected on a given pathway.
